# Supplementary material
Source: publisher figshare collection journal article supplement (https://acs.figshare.com/ndownloader/files/10735414)
Supplement: Supplementary file 1 [file 10735414]

# Supporting Information

## Enhanced out-of-plane electrical transport in n-type SnSe thermoelectrics induced by resonant states and charge delocalization

Hulei Yu,<sup>†,‡</sup> Abdul Rehman Shaikh,<sup>†</sup> Fen Xiong,<sup>†,‡</sup> and Yue Chen<sup>\*,†,‡</sup>

<sup>†</sup>*Department of Mechanical Engineering, The University of Hong Kong, Pokfulam Road,  
Hong Kong SAR, China*

<sup>‡</sup>*HKU Zhejiang Institute of Research and Innovation, 1623 Dayuan Road, Lin An 311305,  
China*

E-mail: yuechen@hku.hk

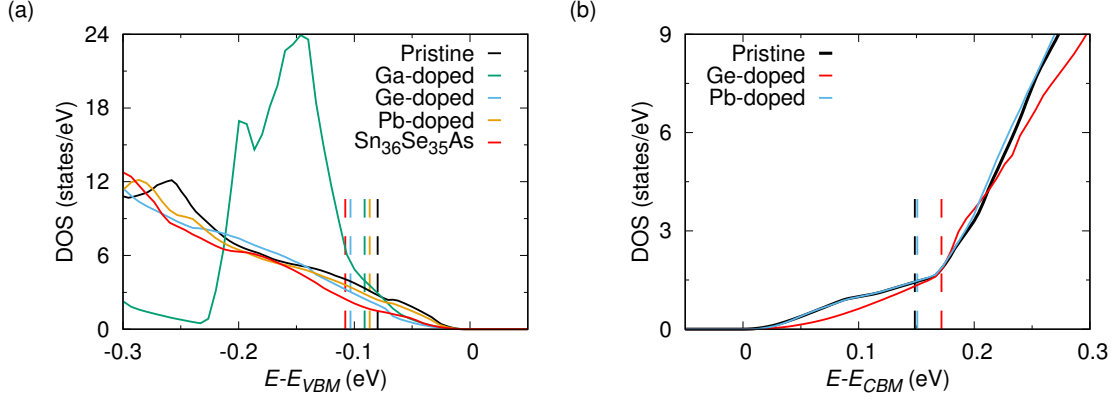

Figure S1: Density of states (DOS) of pristine and doped SnSe. (a) The valence band DOS. (b) The conduction band DOS. The vertical dashed lines represent the positions corresponding to a carrier concentration of  $10^{20} \text{ cm}^{-3}$ .

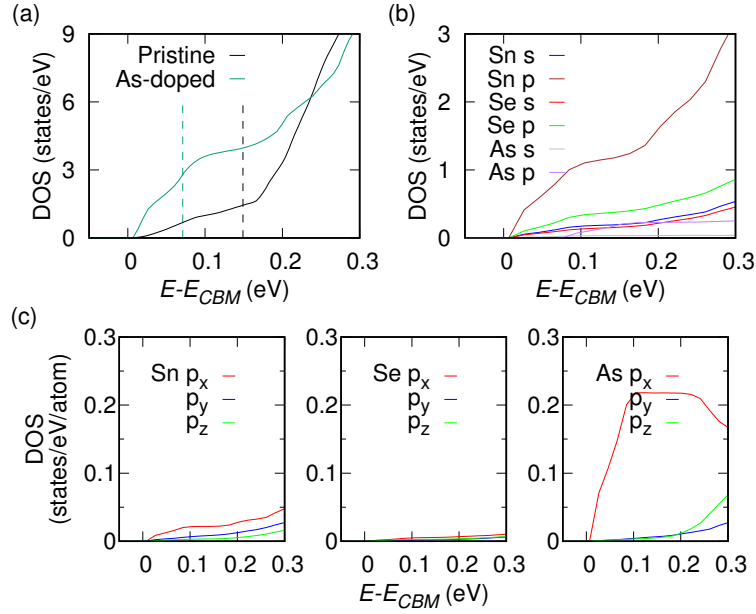

Figure S2: (a) Density of states of pristine and As-doped SnSe, where As substitutes for the Sn site. The vertical dashed lines represent the positions corresponding to a carrier concentration of  $10^{20} \text{ cm}^{-3}$ . (b and c) The projected DOS of As-doped SnSe.

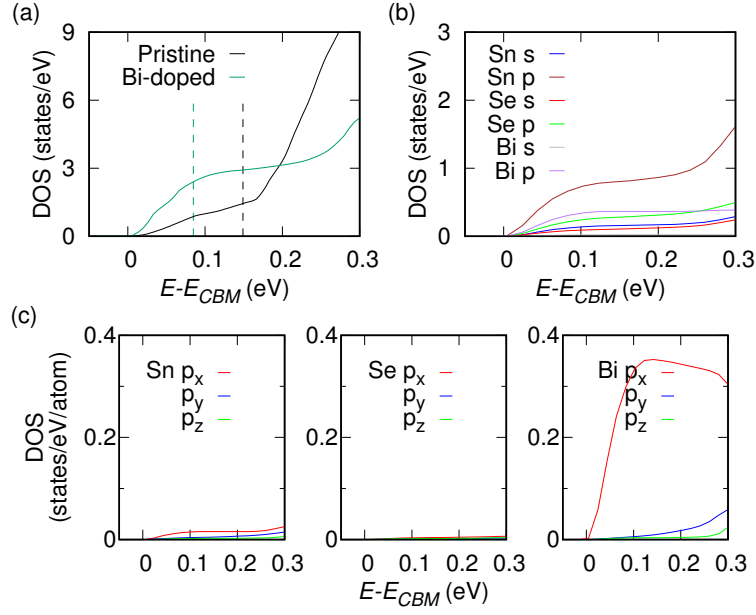

Figure S3: (a) Density of states of pristine and Bi-doped SnSe, where Bi substitutes for the Sn site. The vertical dashed lines represent the positions corresponding to a carrier concentration of  $10^{20} \text{ cm}^{-3}$ . (b and c) The projected DOS of Bi-doped SnSe.

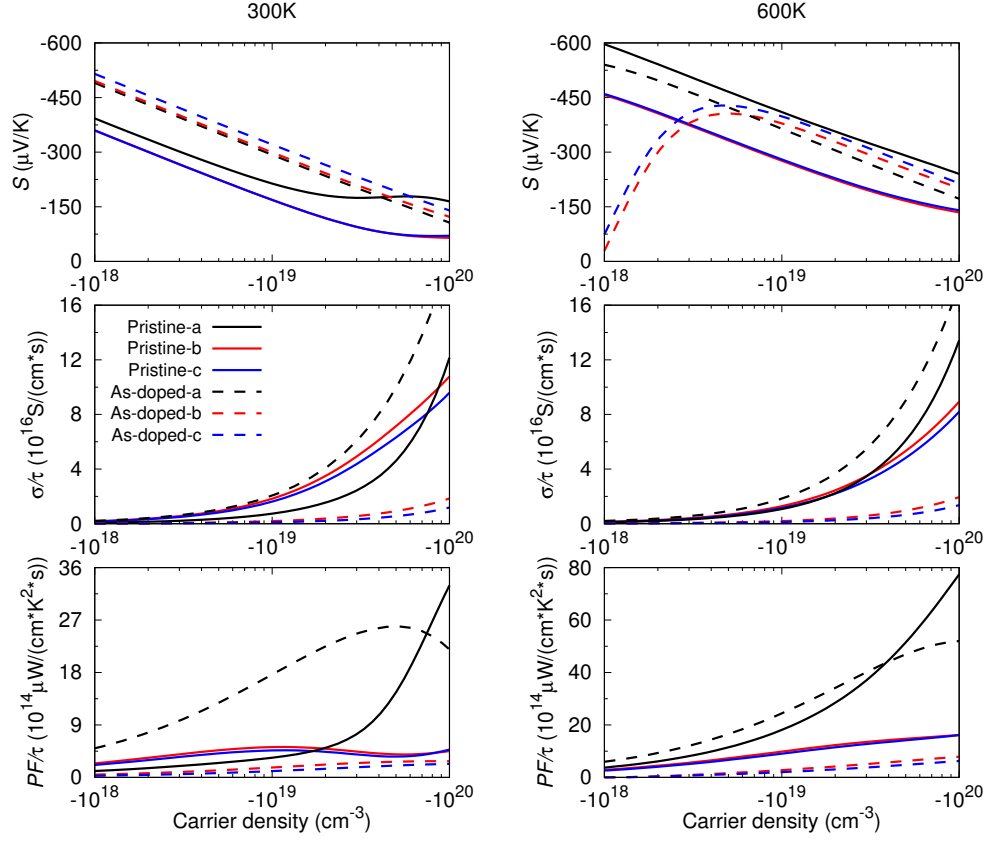

Figure S4: Seebeck coefficients (top), electrical conductivities normalized by the relaxation time (middle), and normalized power factors (bottom) of As-doped SnSe, where As substitutes for the Sn site.

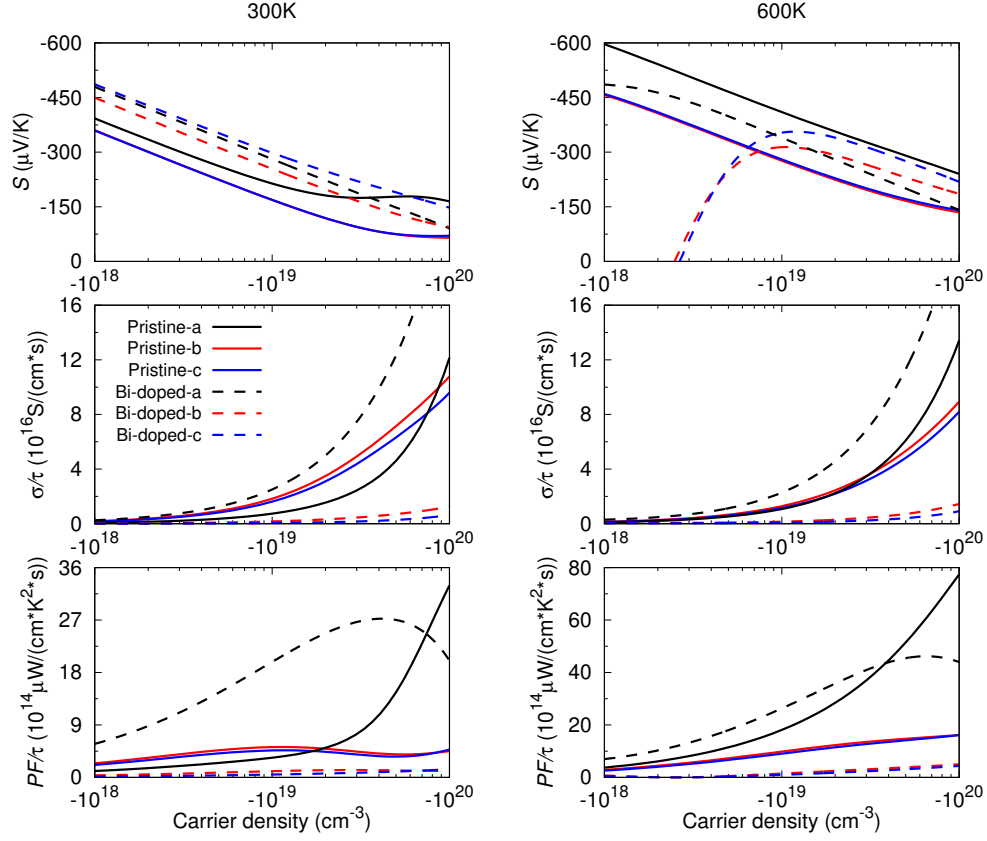

Figure S5: Seebeck coefficients (top), electrical conductivities normalized by the relaxation time (middle), and normalized power factors (bottom) of Bi-doped SnSe, where Bi substitutes for the Sn site.
